# Supplementary material for: Profiling of circular RNAs in age-related cataract reveals circZNF292 as an antioxidant by sponging miR-23b-3p
Source: publisher site journal article supplement (doi:10.18632/aging.103683), 2020-09-10
Supplement: Supplementary file [file aging-v12i17-103683-supplementary-material-SD1.pdf]

## SUPPLEMENTARY TABLE

**Supplementary Table 1. The clinical characteristics of the age-related cataract patients involved in this study.**

| Patient NO. | Age (y) | Gender | LOCS III Grade                | Sample use |
|-------------|---------|--------|-------------------------------|------------|
| 1           | 54      | male   | NO4C4P1, NC4                  | RNA-Seq    |
| 2           | 54      | male   | NO3C5P2, NC3                  | RNA-Seq    |
| 3           | 54      | male   | NO3C4P1, NC3                  | RNA-Seq    |
| 4           | 56      | female | NO3C5P1, NC3                  | RNA-Seq    |
| 5           | 60      | female | NO4C3P1, NC4                  | RNA-Seq    |
| 6           | 63      | female | NO3C3P1, NC3                  | RNA-Seq    |
| 7           | 64      | female | NO4C4P1, NC4                  | RNA-Seq    |
| 8           | 64      | male   | NO3C3P1, NC3                  | RNA-Seq    |
| 9           | 65      | male   | NO3C3P1, NC3                  | RNA-Seq    |
| 10          | 66      | female | NO3C3P1, NC3                  | RNA-Seq    |
| 11          | 71      | female | NO5C4P2, NC5                  | RNA-Seq    |
| 12          | 71      | female | NO5C4P1, NC5                  | RNA-Seq    |
| 13          | 72      | male   | NO3C5P1, NC3                  | RNA-Seq    |
| 14          | 74      | female | NO5C5P2, NC5                  | RNA-Seq    |
| 15          | 79      | male   | NO4C5P1, NC4                  | RNA-Seq    |
| 16          | 79      | female | NO5C5P2, NC5                  | RNA-Seq    |
| 17          | 81      | male   | NO6C5P1, NC6                  | RNA-Seq    |
| 18          | 81      | male   | NO4C4P1, NC4                  | RNA-Seq    |
| 19          | 79      | female | NO4C3P1, NC4                  | qRT-PCR    |
| 20          | 77      | male   | NO4C3P1, NC4                  | qRT-PCR    |
| 21          | 74      | female | NO4C4P1, NC4/<br>NO4C4P1, NC4 | qRT-PCR    |
| 22          | 70      | male   | NO3C3P3, NC3                  | qRT-PCR    |
| 23          | 68      | male   | NO5C4P1, NC5                  | qRT-PCR    |
| 24          | 67      | female | NO3C3P1, NC3                  | qRT-PCR    |
| 25          | 67      | male   | NO4C3P1, NC4                  | qRT-PCR    |
| 26          | 65      | female | NO3C2P1, NC3                  | qRT-PCR    |
| 27          | 65      | female | NO3C3P1, NC3/<br>NO3C3P1, NC3 | qRT-PCR    |
| 28          | 64      | female | NO3C3P1, NC3/<br>NO3C3P1, NC3 | qRT-PCR    |
| 29          | 63      | male   | NO3C5P1, NC3                  | qRT-PCR    |
| 30          | 63      | male   | NO5C4P1, NC5                  | qRT-PCR    |
| 31          | 62      | female | NO5C3P1, NC5                  | qRT-PCR    |
| 32          | 59      | male   | NO3C4P1, NC3                  | qRT-PCR    |
| 33          | 57      | male   | NO5C3P1, NC5                  | qRT-PCR    |

Note: A total of 33 age-related cataract patients (36 eyes) in this study.

NC: nuclear color; NO: nuclear opalescence; C: cortical cataract; P: posterior subcapsular cataract.
